# Supplementary material
Source: PubMed Central journal article supplement (PMC6592693)
Supplement: NIHMS1527029-supplement-2.pdf [file NIHMS1527029-supplement-2.pdf]

Supplementary Figure S2:

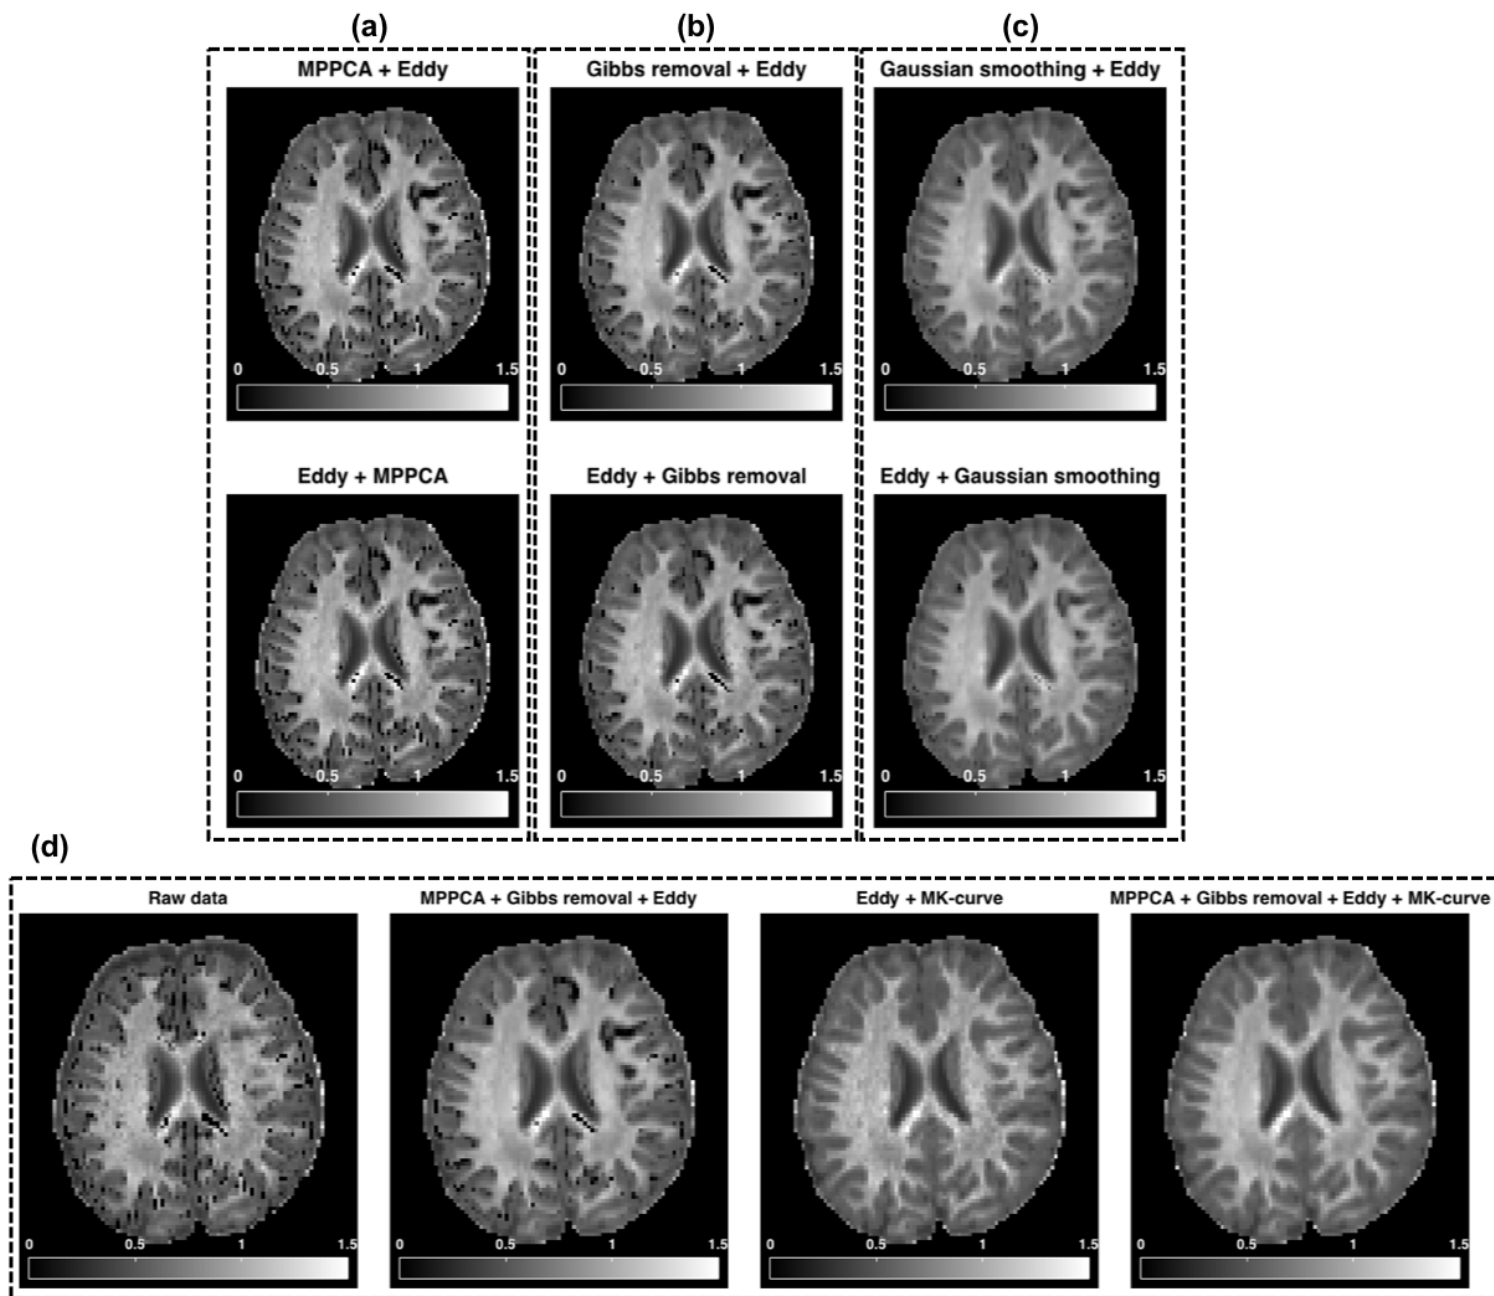

**Figure S2. The effect of the order of method application.** MPPCA, Gibbs removal and Gaussian smoothing should ideally be applied before preprocessing steps such as Eddy. The effect on MK maps of reversing the application order (a-c) shows that the processing order did not have large effects on the results. Concatenating the three pre-processing steps (i.e. MPPCA for denoising, Gibbs removal and eddy correction) corrects some of the implausible voxels, but less than when the proposed MK-curve is applied instead. Applying the MK-curve method following the application of the three preprocessing steps provides the smoothest MK map.
