# Supplementary material
Source: PubMed Central journal article supplement (PMC6592693)
Supplement: NIHMS1527029-supplement-3.pdf [file NIHMS1527029-supplement-3.pdf]

Supplementary Figure S3:

(a) Original and corrected parameter maps

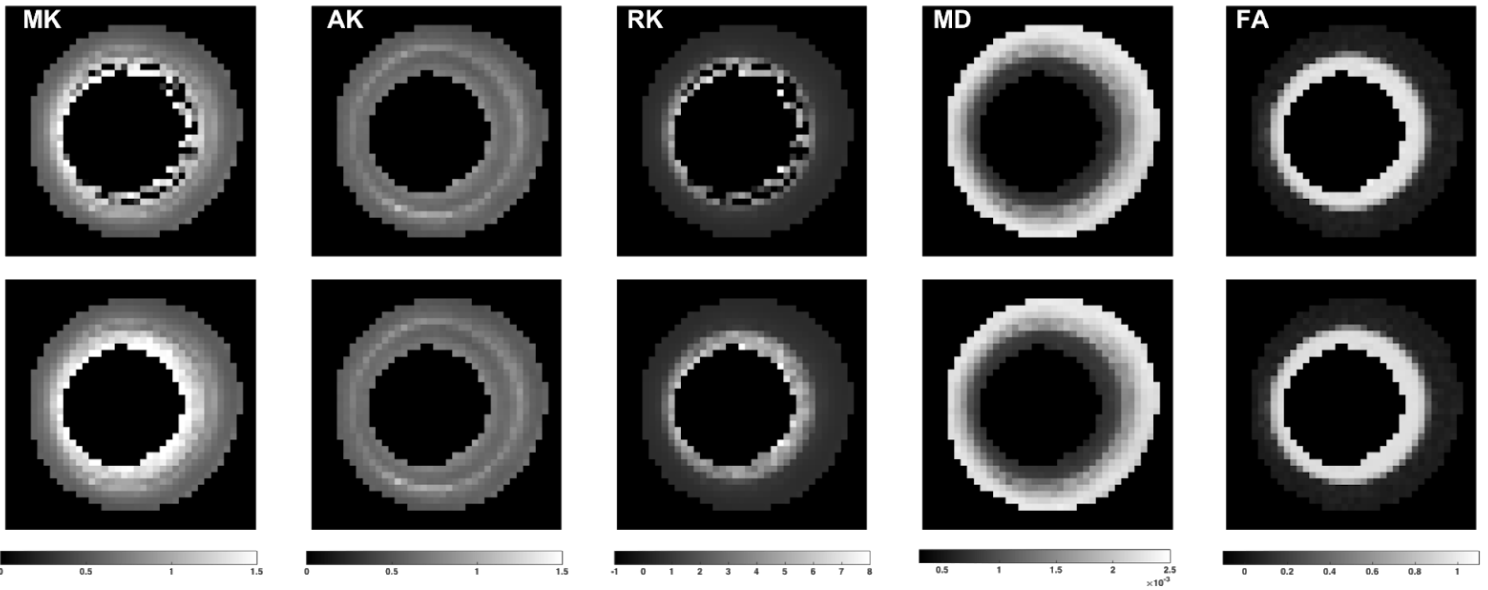

(b) Histogram of parameter before and after correction

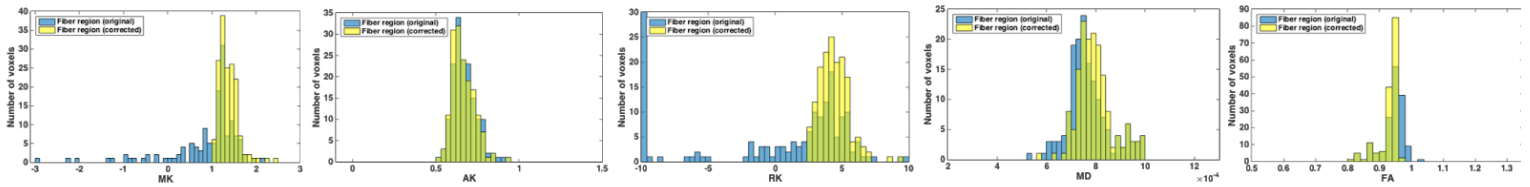

(c) Mean absolute bias before and after correction

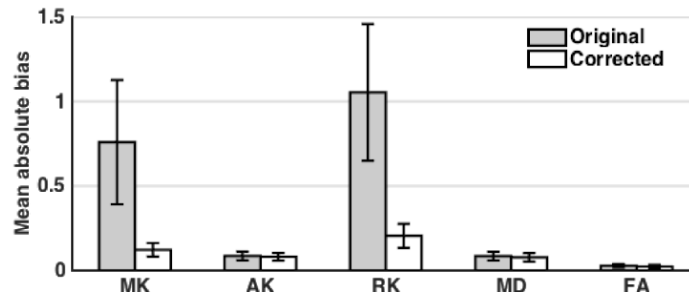

**Figure S3. Correction of additional DKI and DTI parameters on the DKI phantom data.** The output of the MK-curve approach is compared with the original images for the mean kurtosis (MK), axial kurtosis (AK), and radial kurtosis (RK), as well as two diffusion tensor parameter maps: mean diffusivity (MD) and fractional anisotropy (FA) (a). For each parameter map, the values are truncated to the ranges displayed on the colorbar. Apparent improvements is mostly visible on the RK map. From the histogram of RK values (b) we can see that while the peak of the distributions remained the same, negative and low RK values were eliminated. As for AK, MD and FA, the original maps did not show clear implausible values, and the corrected images were very similar, as were the peaks of the histograms. Mean absolute bias for each parameter is shown in (c) (error bars in (b) represent  $\text{std}/3$ ). The mean absolute bias of MK is  $0.759 \pm 1.102$  in the original data and  $0.122 \pm 0.120$  after correction, that of AK is  $0.086 \pm 0.077$  in the original data and  $0.081 \pm 0.068$  after correction, that of RK is  $1.054 \pm 1.214$  in the original data and  $0.205 \pm 0.213$  after correction, that of MD is  $0.085 \pm 0.078$  in the original data and  $0.078 \pm 0.075$  after correction, and that of FA is  $0.028 \pm 0.031$  in the original data and  $0.023 \pm 0.031$  after correction.
